# Supplementary material
Source: publisher site journal article supplement (https://www.e-cmh.org/upload/media/cmh-2023-0506-Supplementary-Figure-5.pdf)
Supplement: Supplementary file 1 [file cmh-2023-0506-Supplementary-Figure-5.pdf]

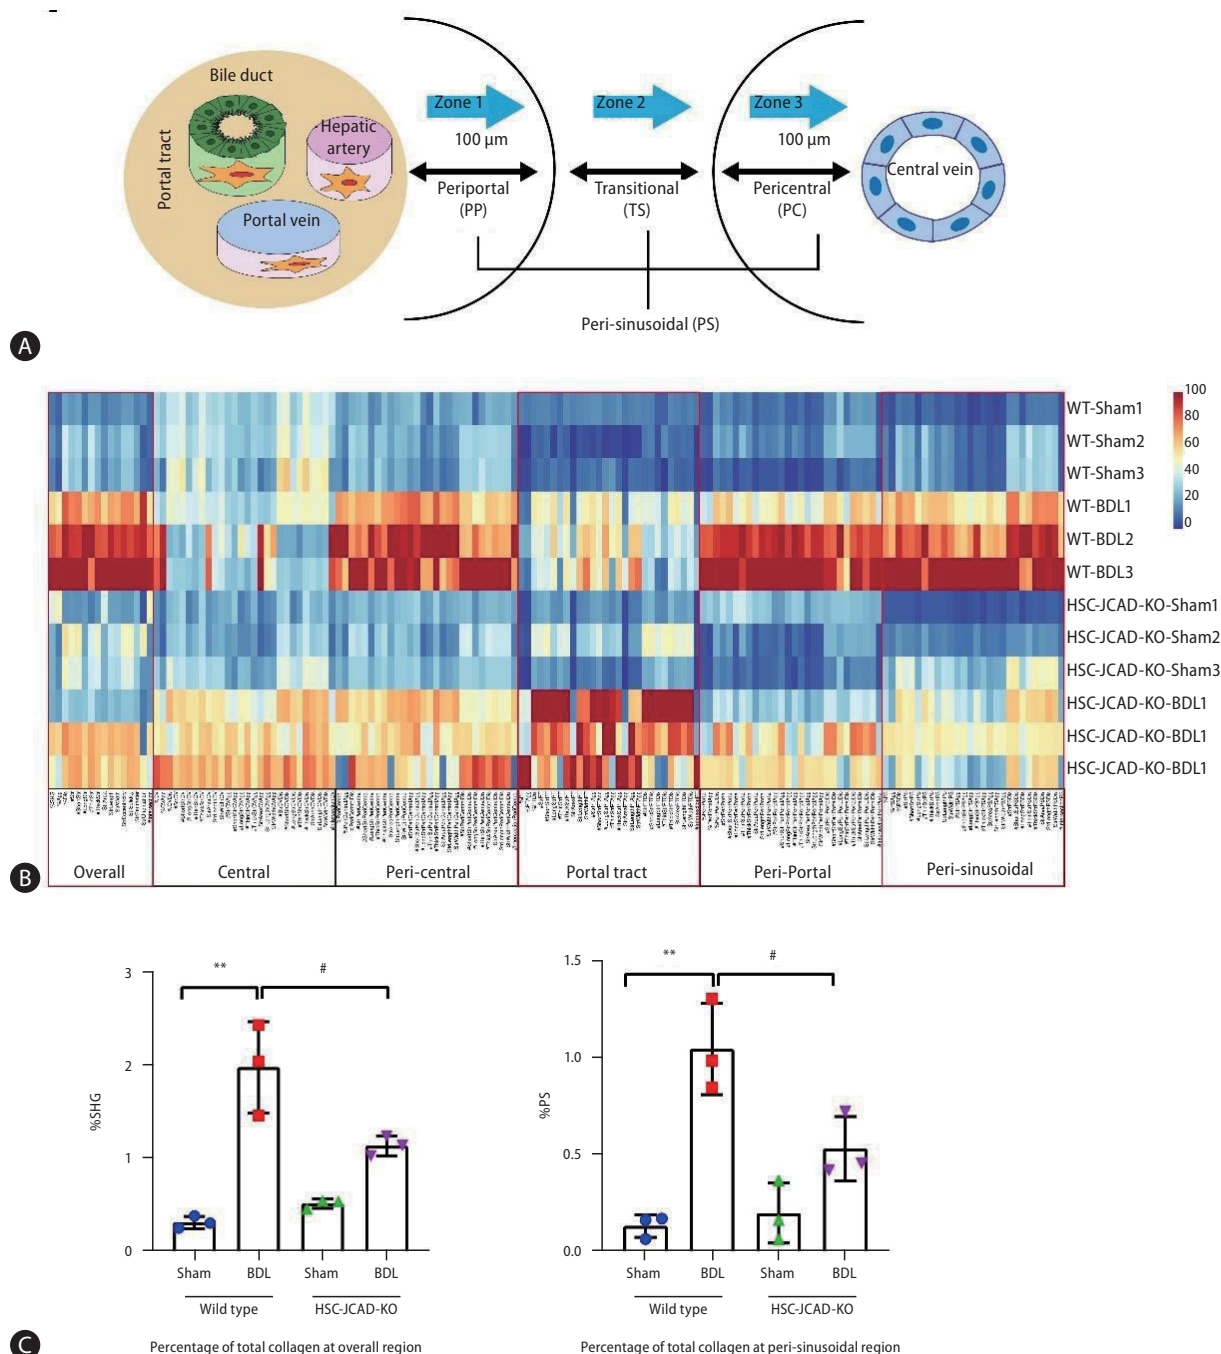

**Supplementary Figure 5.** HSC-specific JCAD depletion mitigated liver fibrosis especially in the perisinusoidal area. (A) Second harmonic generation/two-photon excitation fluorescence (SHG/TPEF) microscopy technology detection schematic diagram. (B) Heatmap for collagen fiber quantitation on a continuous scale by SHG/TPEF microscopy. (C) Zonal fibrosis quantitation, as a percentage change of fibrosis area, reveals marked fibrosis reduction in the perisinusoidal area ( $n=3$ ). All data were expressed as mean  $\pm$  SD. \*\* $P < 0.05$ , and 0.01 vs. WT-Sham mice; # $P < 0.05$  vs. WT-BDL mice.
